# Supplementary material for: Lipidomic approach for stratification of acute myeloid leukemia patients
Source: PubMed Central journal article supplement (PMC5313223; doi:10.1371/journal.pone.0168781), 2017-02-16

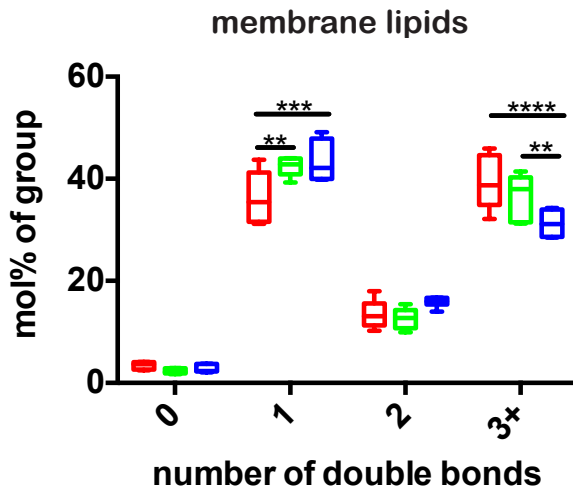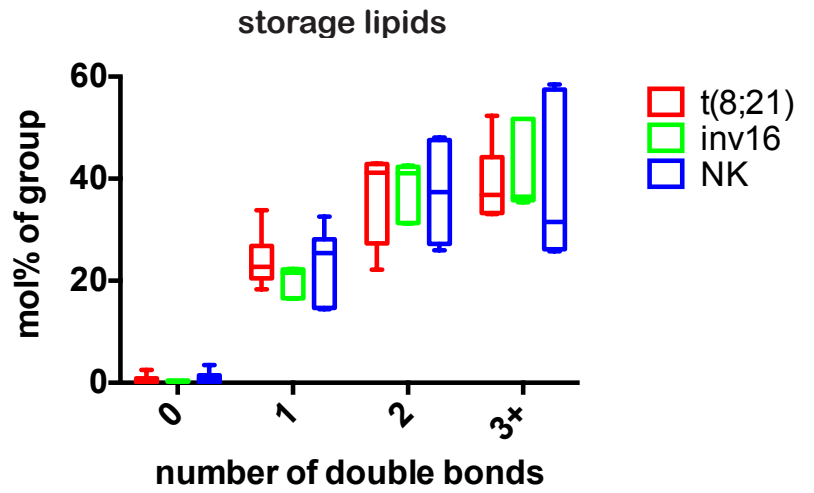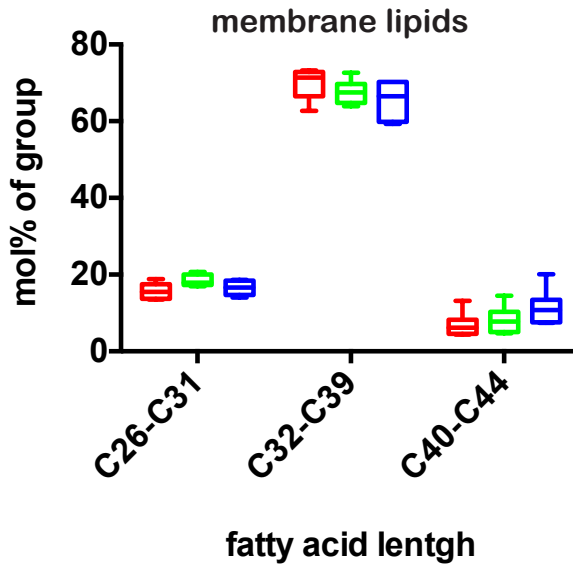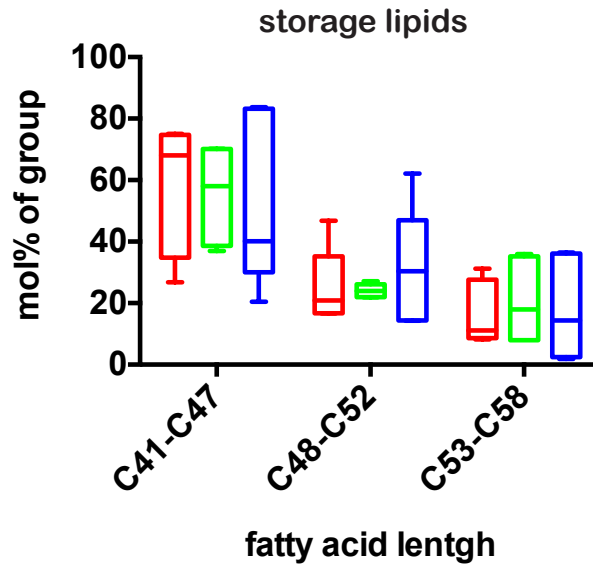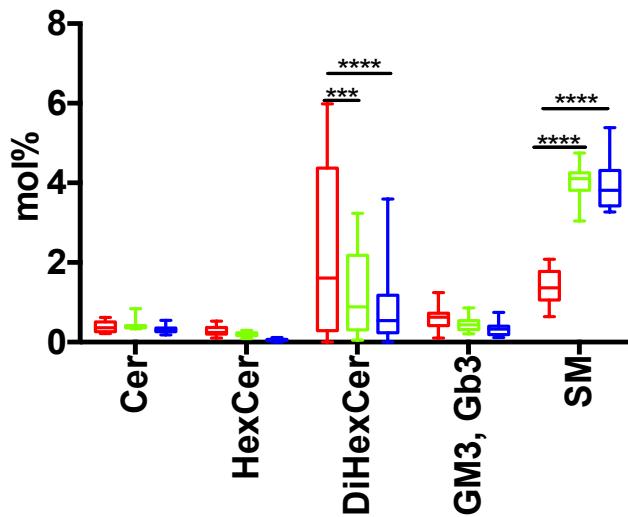

Supplement: pone.0168781.s001.pdf [file pone.0168781.s001.pdf]
